# Supplementary material for: Suppressing shear strains in electrode calendering for enhanced high-voltage stability
Source: Research Square preprint supplement (doi:10.21203/rs.3.rs-7364995/v1), 2025-09-09
Supplement: Supplementary file 1 [file d0b46a8cff20d332c81d6435.docx]

**Supporting information**


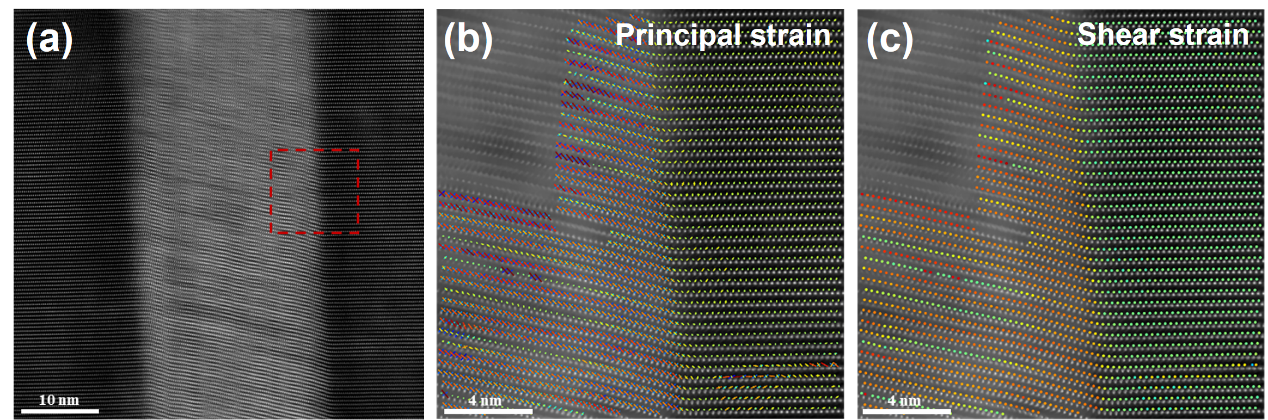


**Fig. S1** (a) HAADF image of a region at the interface between a stripe and layered structure region. (b) Principal strain and (c) shear strain maps of the highlighted region in (a).


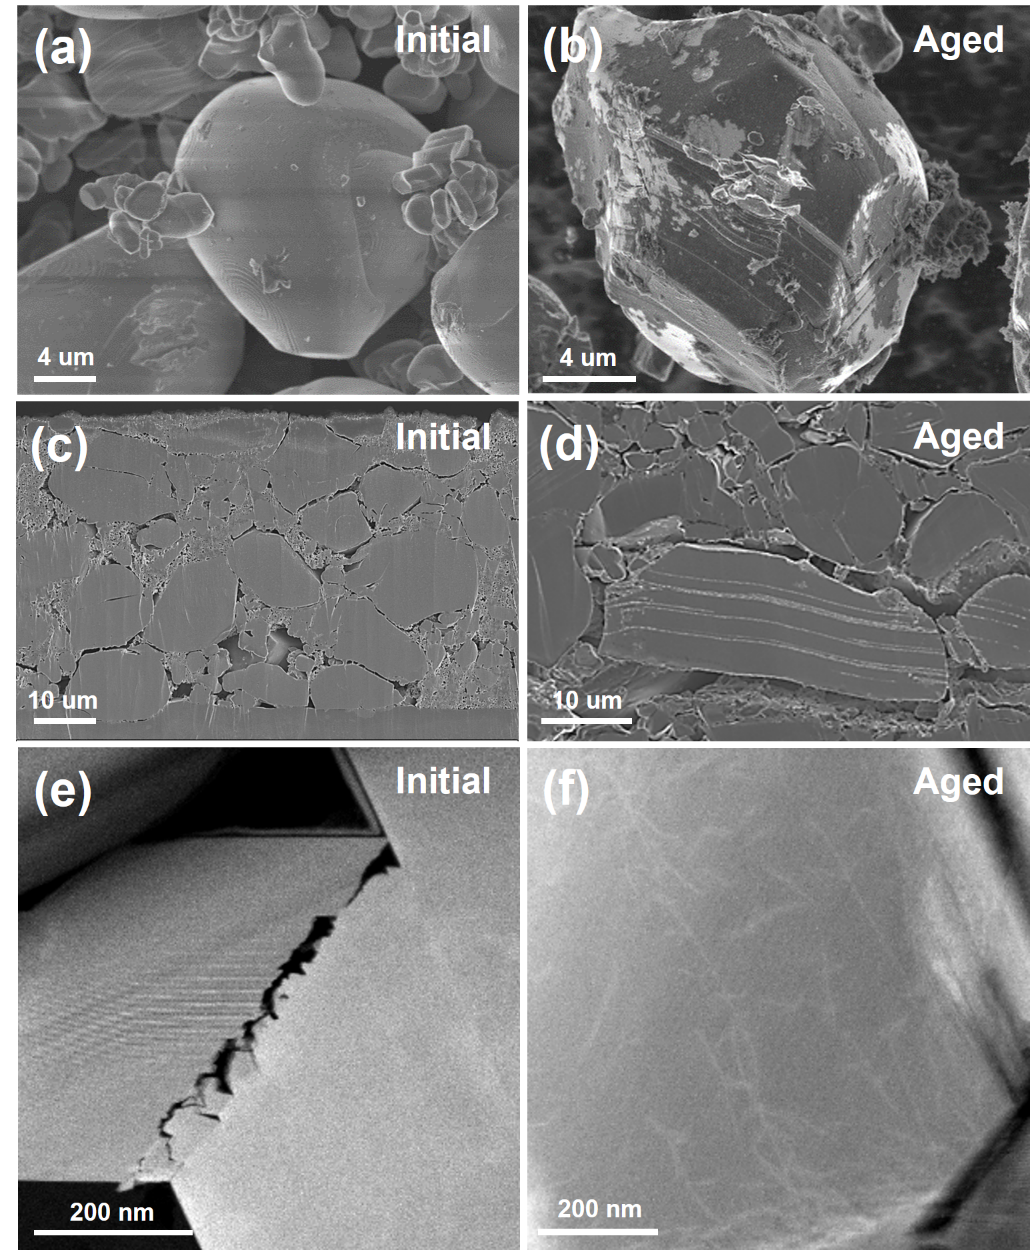


**Fig. S2** (a-b) SEM SE images of the initial and aged LCO particles, respectively. (c-d) SEM BSE images of the cross sections of the initial and aged LCO particles, respectively. (e-f) STEM HAADF images of the initial and aged LCO lamellae. The initial LCO particles are collected from the initial LCO pouch cell before the storage.

**
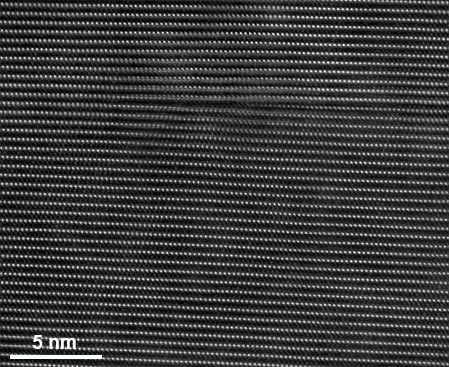
**

**Fig. S3** Atomic-resolution STEM HAADF image of the edge dislocation in the bulk region.


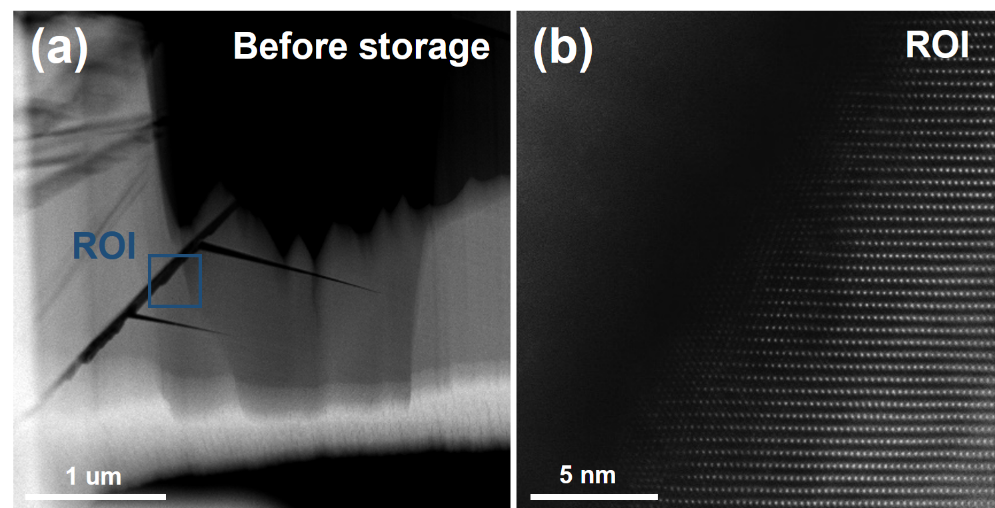


**Fig. S4** (a) STEM HAADF image of the cracks of the initial LCO particle. (b) Atomic-resolution STEM HAADF image of the surface at the cracks shown in (a).


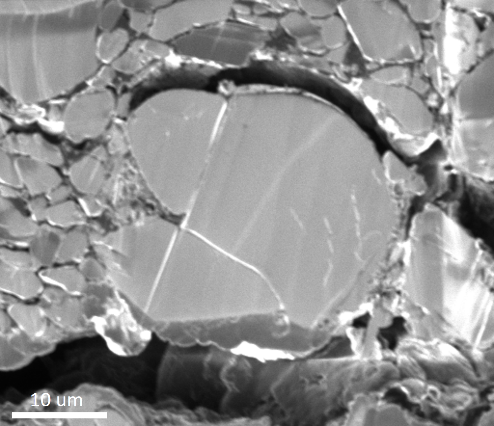


**Fig. S5** SimultaneousSEM image of the cross section of the aged LCO.
